# Supplementary material
Source: PubMed Central journal article supplement (PMC6191095)
Supplement: fj.201601063R.sf1.pdf [file fj.201601063R.sf1.pdf]

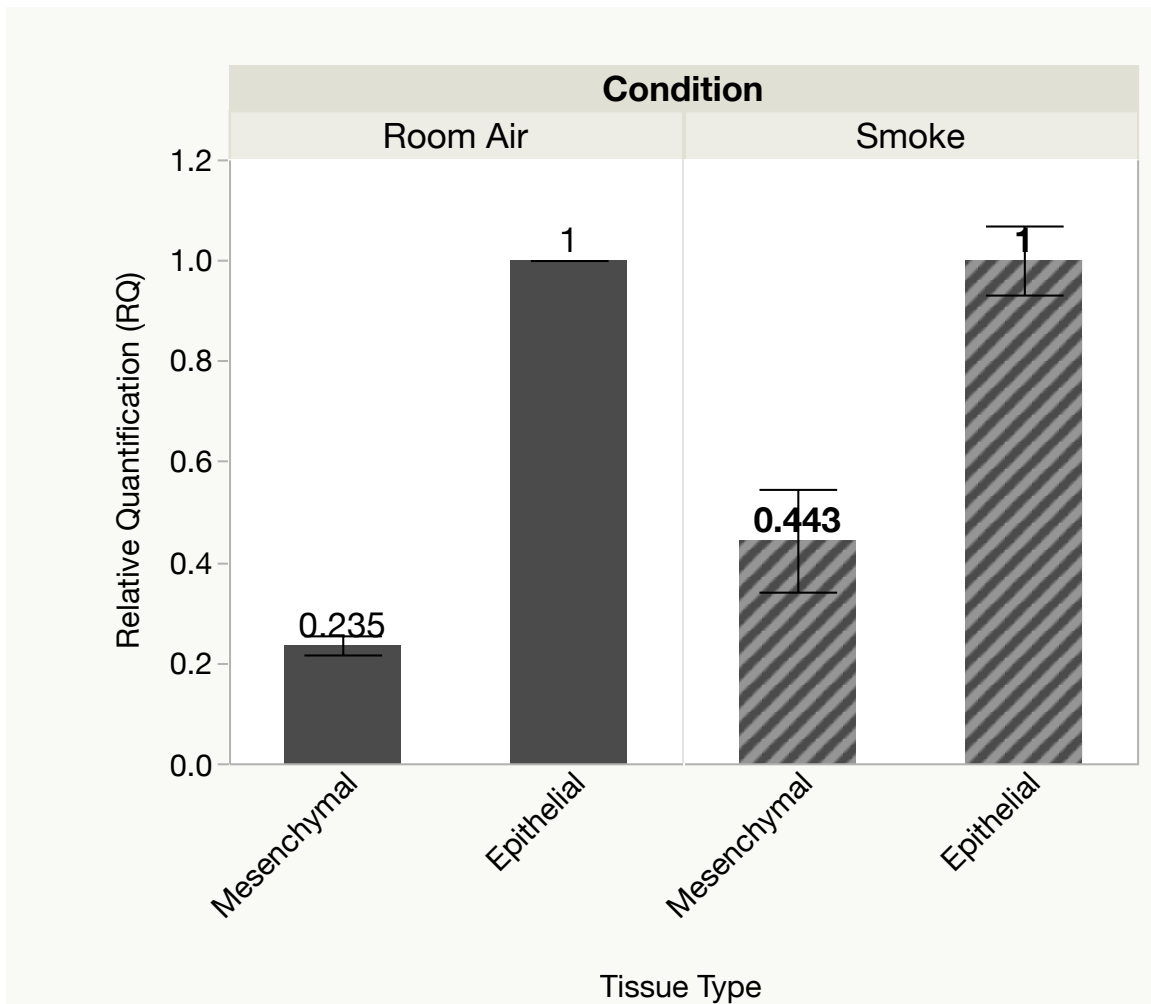

**Supplemental Figure 1: Confirmatory RT-qPCR analysis of epithelial origin of laser capture micro-dissected tissues obtained from 16.5dpc fetal lungs** – Relative quantification results shown have been corrected for GAPDH expression levels. Each error bar is constructed using 1 standard error from the mean. Statistical analysis and graphing was performed using JMP 13. In addition to identifying the epithelial origin of the LCM tissues, smoke-induced increases in overall marker expression in both epithelial and mesenchymal tissues is evident in cDNA samples mixed with AGER primers.
